# Supplementary material for: Isolation, purification and characterization of novel antimicrobial compound 7-methoxy-2,2-dimethyl-4-octa-4′,6′-dienyl-2H-napthalene-1-one from Penicillium sp. and its cytotoxicity studies
Source: PubMed Central journal article supplement (PMC4492345; doi:10.1186/s13568-015-0120-9), 2015-07-04
Supplement: 13568_2015_120_MOESM1_ESM.pdf [file 13568_2015_120_MOESM1_ESM.pdf]

Isolation, Purification and Characterization of novel Antimicrobial Compound 7-Methoxy-2,2-dimethyl-4-octa-4',6'-dienyl-2H-naphthalene-1-one from *Penicillium* sp. and its cytotoxicity studies.

---

AMB Express

---

**Harpreet Kaur<sup>a</sup>, Jemimah Gesare Onsare<sup>a</sup>, Vishal Sharma<sup>b</sup> and Daljit Singh Arora<sup>a\*</sup>**

<sup>a</sup> Microbial Technology Laboratory, Department of Microbiology

<sup>b</sup> Department of Pharmaceutical Sciences, Guru Nanak Dev University, Amritsar-143005, India

Tel. No. 91-183-2258802-09 Ext. 3316, Fax No. 91-183-2258819-20

\*Corresponding author: Prof. Daljit Singh Arora, Microbial Technology Laboratory

Department of Microbiology, Guru Nanak Dev University, Amritsar-143005, India

E-mail: [daljit\\_02@yahoo.co.in](mailto:daljit_02@yahoo.co.in)

Guru Nanak Dev University-Amritsar

|                      |                                  |                                              |                     |
|----------------------|----------------------------------|----------------------------------------------|---------------------|
| <b>Analysis Info</b> |                                  | <b>Acquisition Date</b> 5/21/2014 3:24:15 PM |                     |
| Analysis Name        | D:\Data\user data\DS ARORAKB13.d | Operator                                     | Aminder/Prateek     |
| Method               | tune_wide.m                      | Instrument                                   | micrOTOF-Q II 10356 |
| Sample Name          | sh-35                            |                                              |                     |
| Comment              |                                  |                                              |                     |

|                              |            |                       |           |
|------------------------------|------------|-----------------------|-----------|
| <b>Acquisition Parameter</b> |            |                       |           |
| Source Type                  | ESI        | Ion Polarity          | Positive  |
| Focus                        | Not active | Set Capillary         | 4500 V    |
| Scan Begin                   | 50 m/z     | Set End Plate Offset  | -500 V    |
| Scan End                     | 3000 m/z   | Set Collision Cell RF | 650.0 Vpp |
|                              |            | Set Nebulizer         | 0.4 Bar   |
|                              |            | Set Dry Heater        | 160 °C    |
|                              |            | Set Dry Gas           | 4.0 l/min |
|                              |            | Set Divert Valve      | Waste     |

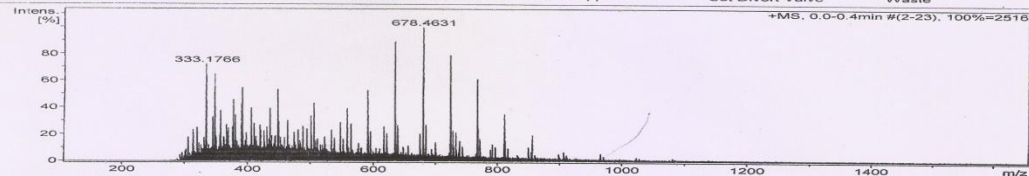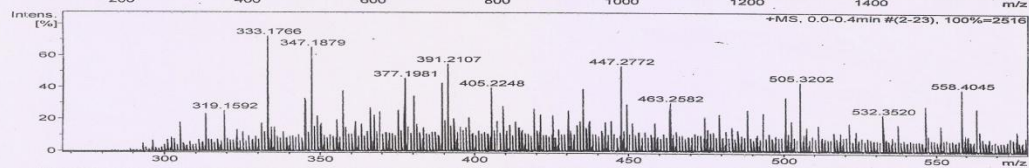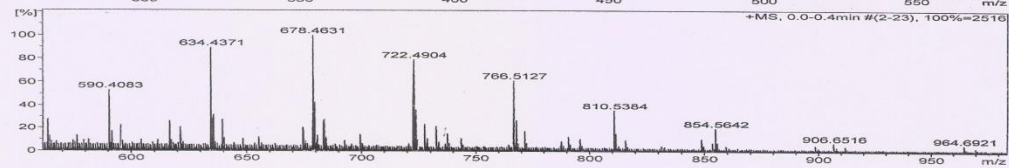

Fig. S1 Mass spectrum of the purified compound
